# Supplementary material
Source: PubMed Central journal article supplement (PMC5402294)
Supplement: jp6b10055_si_001.pdf [file jp6b10055_si_001.pdf]

# Smoothed Biasing Forces Yield Unbiased Free Energies with the Extended-System Adaptive Biasing Force Method

Adrien Lesage,<sup>†</sup> Tony Lelièvre,<sup>‡</sup> Gabriel Stoltz,<sup>‡</sup> and Jérôme Hénin<sup>\*,†</sup>

<sup>†</sup>*Laboratoire de Biochimie Théorique, Institut de Biologie Physico-Chimique, CNRS, Paris,  
France*

<sup>‡</sup>*CERMICS, École des Ponts ParisTech, Marne-la-Vallée, France*

E-mail: [jerome.henin@ibpc.fr](mailto:jerome.henin@ibpc.fr)

Phone: +33 158415166. Fax: +33 158415179

## Appendix: Derivations of formulas used in the text

### CZAR for a scalar variable

Starting from the joint distribution of Equation (??):

$$\begin{aligned}\tilde{\rho}^k(z, \lambda) &= Z^{-1} \rho(z) \exp\left(-\beta k \frac{(\lambda - z)^2}{2}\right) \exp(\beta A^k(\lambda)) \\ \ln \rho(z) &= \ln(Z) + \ln \tilde{\rho}^k(z, \lambda) + \beta k \frac{(\lambda - z)^2}{2} - \beta A^k(\lambda) \\ A(z) &= -\frac{1}{\beta} \ln(Z) - \frac{1}{\beta} \ln \tilde{\rho}^k(z, \lambda) - k \frac{(\lambda - z)^2}{2} + \beta A^k(\lambda)\end{aligned}$$

Inserting the Bayes formula:

$$\begin{aligned}A(z) &= -\frac{1}{\beta} \ln(Z) - \frac{1}{\beta} \ln \tilde{\rho}(\lambda|z) - \frac{1}{\beta} \ln \tilde{\rho}(z) - k \frac{(\lambda - z)^2}{2} + \beta A^k(\lambda) \\ A'(z) &= -\frac{1}{\beta} \frac{d \ln \tilde{\rho}(\lambda|z)}{dz} - \frac{1}{\beta} \frac{d \ln \tilde{\rho}(z)}{dz} + k(\lambda - z) \\ A'(z) \tilde{\rho}(\lambda|z) &= -\frac{1}{\beta} \frac{d \tilde{\rho}(\lambda|z)}{dz} - \frac{1}{\beta} \frac{d \ln \tilde{\rho}(z)}{dz} \tilde{\rho}(\lambda|z) + k(\lambda - z) \tilde{\rho}(\lambda|z) \\ A'(z) \int \tilde{\rho}(\lambda|z) d\lambda &= -\frac{1}{\beta} \int \frac{d \tilde{\rho}(\lambda|z)}{dz} d\lambda - \frac{1}{\beta} \frac{d \ln \tilde{\rho}(z)}{dz} \int \tilde{\rho}(\lambda|z) d\lambda + \int k(\lambda - z) \tilde{\rho}(\lambda|z) d\lambda\end{aligned}$$

Under appropriate regularity and integrability conditions on the marginal distribution, we swap the integral over  $\lambda$  and differentiation with respect to  $z$ , which leads to  $\int \frac{d \tilde{\rho}(\lambda|z)}{dz} d\lambda = 0$ . Noting that  $\int \tilde{\rho}(\lambda|z) d\lambda = 1$ , we obtain the CZAR expression:

$$A'(z) = -\frac{1}{\beta} \frac{d \ln \tilde{\rho}(z)}{dz} + k(\langle \lambda \rangle_z - z).$$

## CZAR for a 2D vector variable

We start from the joint marginal distribution obtained as the  $\xi$ -conditioned integral of the partition function, as in Equation (??):

$$\tilde{\rho}^k(z_1, \lambda_1, z_2, \lambda_2) = Z^{-1} \tilde{\rho}(z_1, z_2) \exp\left(-\beta k_1 \frac{(\lambda_1 - z_1)^2}{2}\right) \exp\left(-\beta k_2 \frac{(\lambda_2 - z_2)^2}{2}\right) \exp(\beta A^k(\lambda_1, \lambda_2))$$

$$A(z_1, z_2) = -\frac{1}{\beta} \ln Z - \frac{1}{\beta} \ln \tilde{\rho}^k(z_1, \lambda_1, z_2, \lambda_2) - k_1 \frac{(z_1 - \lambda_1)^2}{2} - k_2 \frac{(z_2 - \lambda_2)^2}{2} + A^k(\lambda_1, \lambda_2)$$

Inserting the Bayes formula as above:

$$A(z_1, z_2) = -\frac{1}{\beta} \ln Z - \frac{1}{\beta} \ln \tilde{\rho}(\lambda_1, \lambda_2 | z_1, z_2) - \frac{1}{\beta} \ln \tilde{\rho}(z_1, z_2) - k_1 \frac{(z_1 - \lambda_1)^2}{2} - k_2 \frac{(z_2 - \lambda_2)^2}{2} + A^k(\lambda_1, \lambda_2)$$

$$\frac{\partial A(z_1, z_2)}{\partial z_1} = -\frac{1}{\beta} \frac{\partial \ln \tilde{\rho}(\lambda_1, \lambda_2 | z_1, z_2)}{\partial z_1} - \frac{1}{\beta} \frac{\partial \ln \tilde{\rho}(z_1, z_2)}{\partial z_1} - k_1 (z_1 - \lambda_1)$$

$$\frac{\partial A(z_1, z_2)}{\partial z_1} \tilde{\rho}(\lambda_1, \lambda_2 | z_1, z_2) = -\frac{1}{\beta} \frac{\partial \tilde{\rho}(\lambda_1, \lambda_2 | z_1, z_2)}{\partial z_1} - \frac{1}{\beta} \frac{\partial \ln \tilde{\rho}(z_1, z_2)}{\partial z_1} \tilde{\rho}(\lambda_1, \lambda_2 | z_1, z_2) - k_1 (z_1 - \lambda_1) \tilde{\rho}(\lambda_1, \lambda_2 | z_1, z_2)$$

$$\frac{\partial A(z_1, z_2)}{\partial z_1} \int \tilde{\rho}(\lambda_1, \lambda_2 | z_1, z_2) d\lambda_1 d\lambda_2 = -\frac{1}{\beta} \int \frac{\partial \tilde{\rho}(\lambda_1, \lambda_2 | z_1, z_2)}{\partial z_1} d\lambda_1 d\lambda_2 - \frac{1}{\beta} \frac{\partial \ln \tilde{\rho}(z_1, z_2)}{\partial z_1} \int \tilde{\rho}(\lambda_1, \lambda_2 | z_1, z_2) d\lambda_1 d\lambda_2 - k_1 \int (z_1 - \lambda_1) \tilde{\rho}(\lambda_1, \lambda_2 | z_1, z_2) d\lambda_1 d\lambda_2$$

Under the same regularity assumptions as in the scalar case, the first RHS term is zero. Noting that the integral of the joint conditional distribution  $\tilde{\rho}(\lambda_1, \lambda_2 | z_1, z_2)$  is unity, we obtain the two-dimensional CZAR expression:

$$\frac{\partial A(z_1, z_2)}{\partial z_1} = -\frac{1}{\beta} \frac{\partial \ln \tilde{\rho}(z_1, z_2)}{\partial z_1} + k_1 (\langle \lambda_1 \rangle_{z_1, z_2} - z_1).$$

## Distance between a function and its Gaussian convolution

Given a function  $f$  and  $G_\sigma$  the Gaussian kernel of variance  $\sigma^2$ , we consider

$$(G_\sigma * f)(x) \equiv \frac{1}{\sqrt{2\pi}\sigma} \int \exp\left(-\frac{(x-y)^2}{2\sigma^2}\right) f(y)dy$$

as an approximation of  $f(x)$  when  $\sigma$  tends towards zero.

The local error of this estimate is:

$$\begin{aligned} |(G_\sigma * f)(x) - f(x)| &= \left| \frac{1}{\sqrt{2\pi}\sigma} \int \exp\left(-\frac{(x-y)^2}{2\sigma^2}\right) f(y)dy - f(x) \right| \\ &= \left| \frac{1}{\sqrt{2\pi}\sigma} \int \exp\left(-\frac{y^2}{2\sigma^2}\right) f(x-y)dy - f(x) \right| \\ &= \left| \frac{1}{\sqrt{2\pi}\sigma} \int \exp\left(-\frac{y^2}{2\sigma^2}\right) (f(x-y) - f(x))dy \right| \\ &= \left| \frac{1}{\sqrt{2\pi}} \int \exp(-z^2/2)(f(x-\sigma z) - f(x))dz \right|, \end{aligned}$$

where we substitute  $z \equiv y/\sigma$  in the last line.

Assuming that the second derivative of  $f$  is bounded, we can write the following Taylor expansion:

$$f(x - \sigma z) = f(x) - f'(x)\sigma z + f''(x - \theta_{x,z}\sigma z)\frac{(\sigma z)^2}{2}$$

where  $\theta_{x,z} \in [0, 1]$ . Hence

$$\begin{aligned} |(G_\sigma * f)(x) - f(x)| &= \left| \frac{1}{\sqrt{2\pi}} \int \exp(-z^2/2) \left( -f'(x)\sigma z + f''(x - \theta_{x,z}\sigma z)\frac{(\sigma z)^2}{2} \right) dz \right| \\ &= \left| \frac{1}{\sqrt{2\pi}} \int \exp(-z^2/2) f''(x - \theta_{x,z}\sigma z)\frac{(\sigma z)^2}{2} dz \right| \\ &\leq \|f''\|_{L^\infty} \left| \frac{1}{\sqrt{2\pi}} \int \exp(-z^2/2)\frac{(\sigma z)^2}{2} dz \right|, \end{aligned}$$

where  $\|f''\|_{L^\infty}$  is the essential supremum of  $f''$ , i.e. the smallest real number greater than  $f''(x)$

for almost all  $x$  (up to a set of measure zero). Finally, we obtain:

$$|(G_\sigma * f)(x) - f(x)| \leq \|f''\|_{L^\infty} \frac{\sigma^2}{2}.$$
